# Supplementary material for: Transcriptome of the coralline alga Calliarthron tuberculosum (Corallinales, Rhodophyta) reveals convergent evolution of a partial lignin biosynthesis pathway
Source: PLoS One. 2022 Jul 14;17(7):e0266892. doi: 10.1371/journal.pone.0266892 (PMC9282553; doi:10.1371/journal.pone.0266892)
Supplement: S1 Table — Scaffolds are categorized as shared with either red algal (Pyropia yezoensis) genomic scaffolds, eukaryotic sequences, or other bacteria sequences based on sequence similarity. (XLSX) [file pone.0266892.s007.xlsx]

## Sheet: Sheet1
Table S1. Summary statistics for the C. tuberculosum genome assembly. Scaffolds are categorized as shared with either red algal (Pyropia yezoensis) genomic scaffolds, eukaryotic sequences, or other bacteria sequences based on sequence similarity.
Statistics	Pyropia yezoensis	Other Eukaryotes	Bacteria
% GC	65.78	60.21	56.19
Main genome scaffold total	2125	180	847
Main genome contig total	2183	180	847
Main genome scaffold sequence total	87.7 Mb	21.2 Mb	64.5 Mb
Main genome contig sequence total	87.6 Mb (0.1% gaps)	21.2 Mb (0.0% gap)	64.5 Mb (0.0% gaps)
Main genome scaffold N/L50	130/202.0 kb	17/473.0 kb	14/872.0 kb
Main genome contig N/L50	137/188.0 kb	17/473.0 kb	14/872.0 kb
Number of scaffolds > 50 kb	436	58	154
% Main genome in scaffolds > 50 kb	0.884	0.938
